# Supplementary material
Source: PubMed Central journal article supplement (PMC2447132)

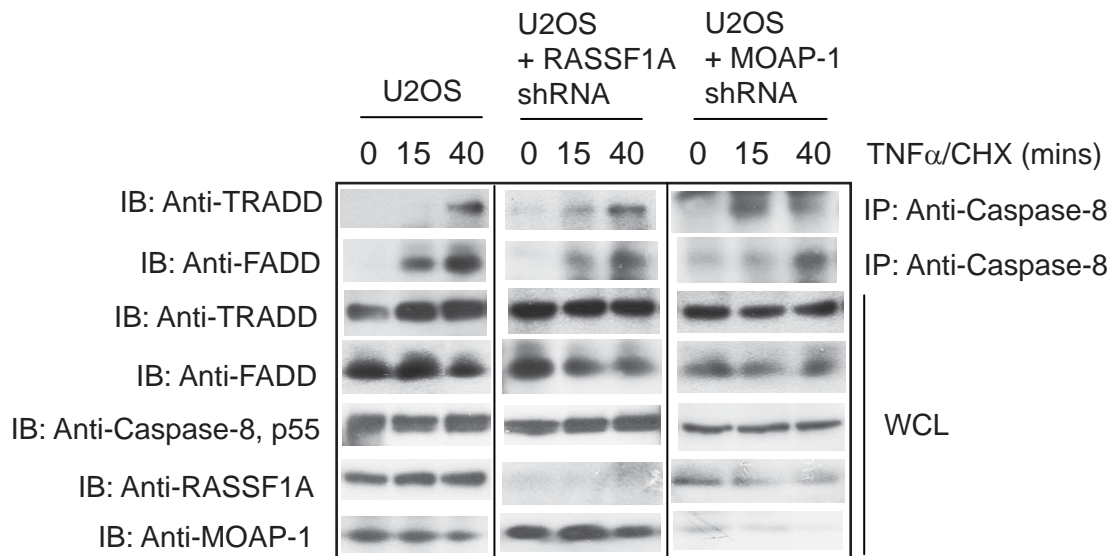

Foley et al\_Supplemental file 1 - Fig. S1

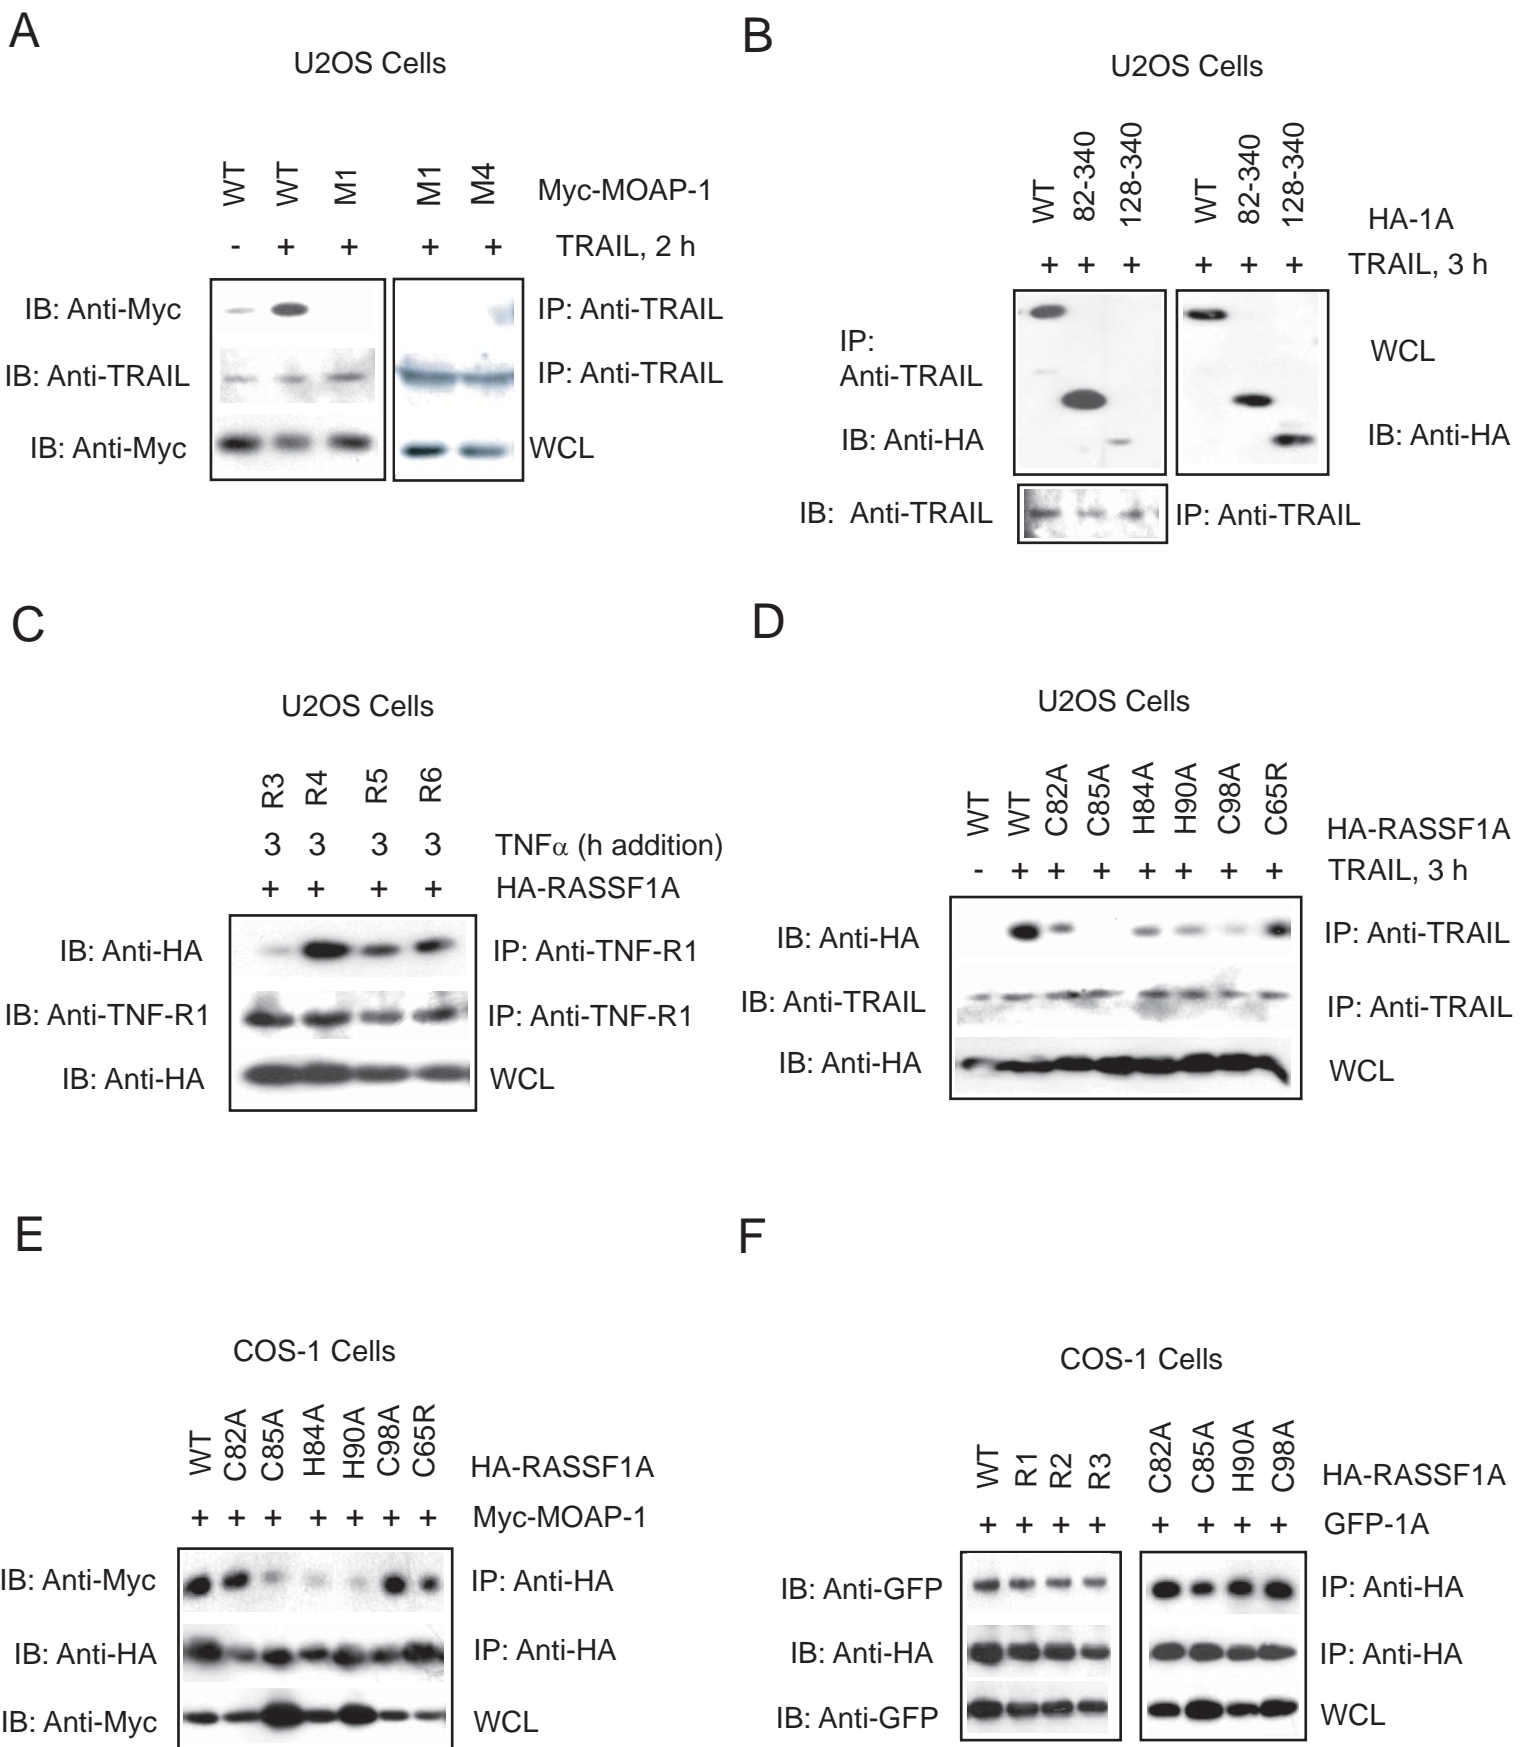

**A**

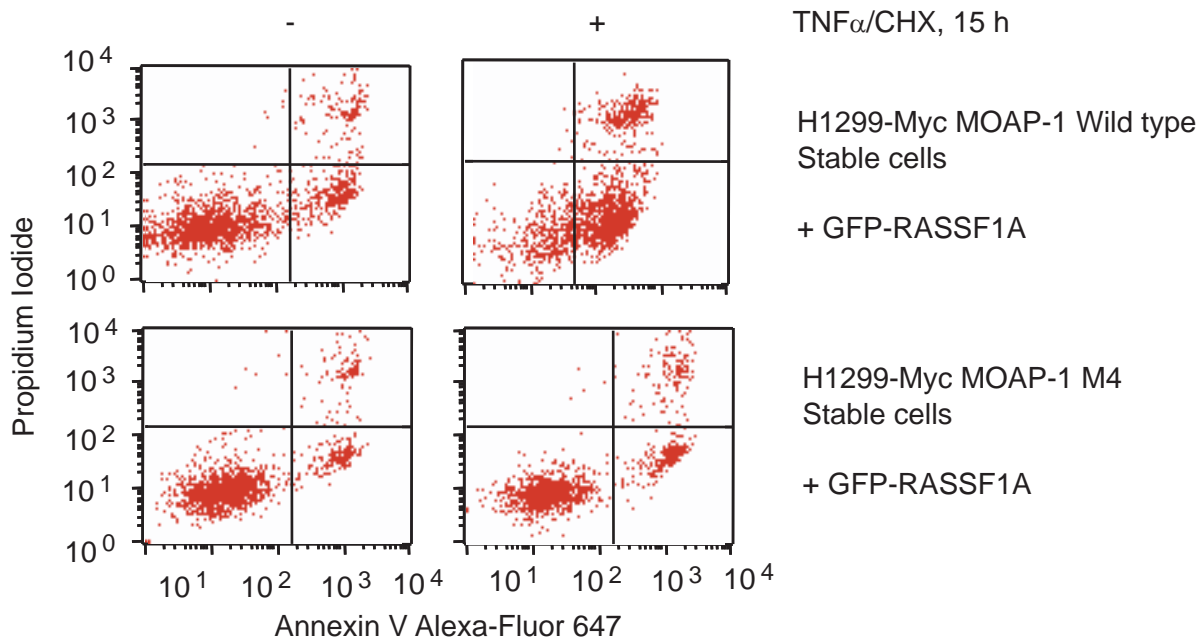

**B**

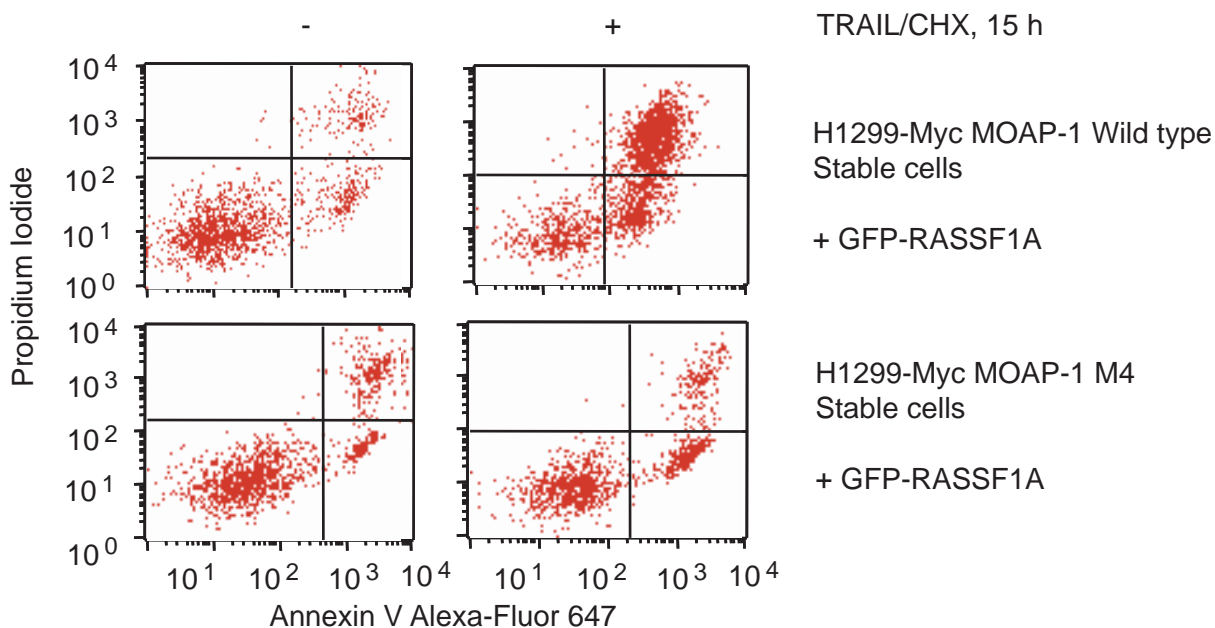

**C**

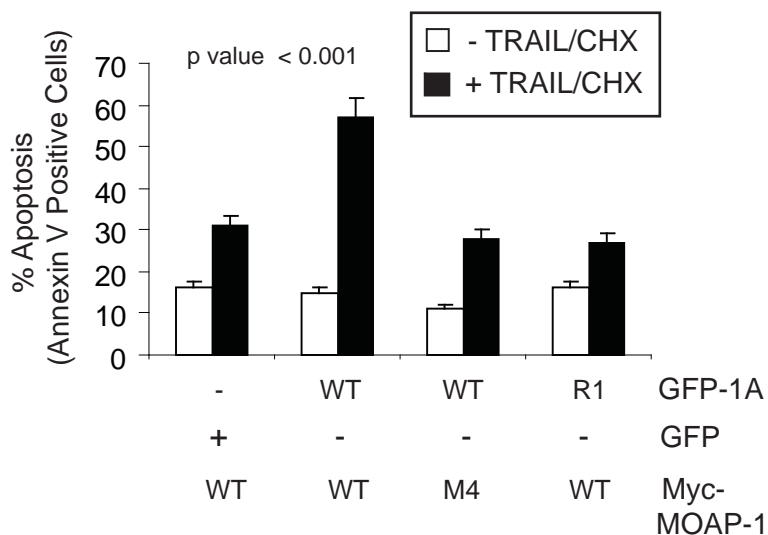

**D**

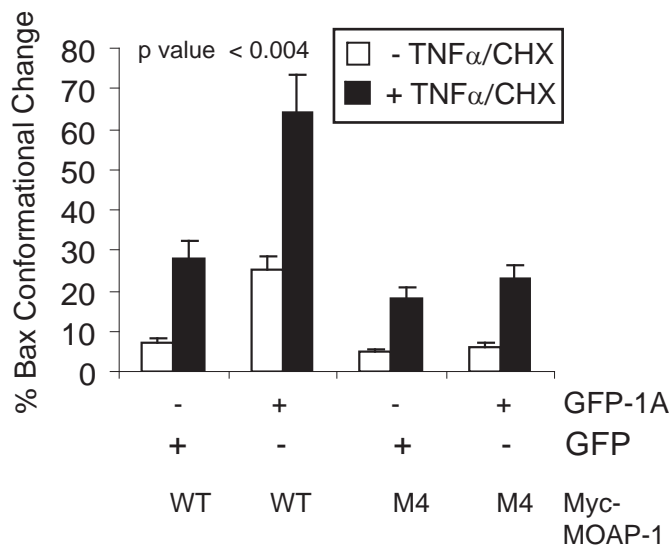

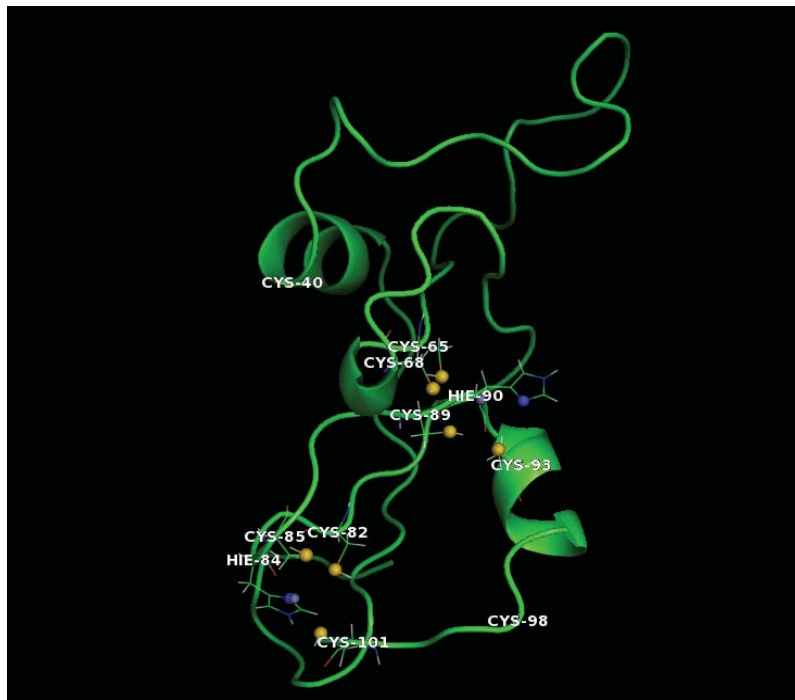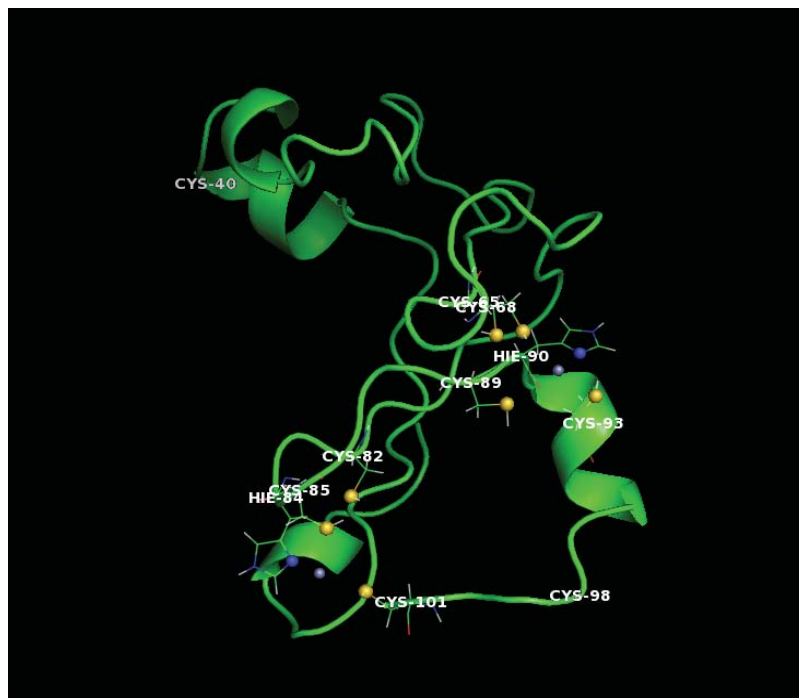

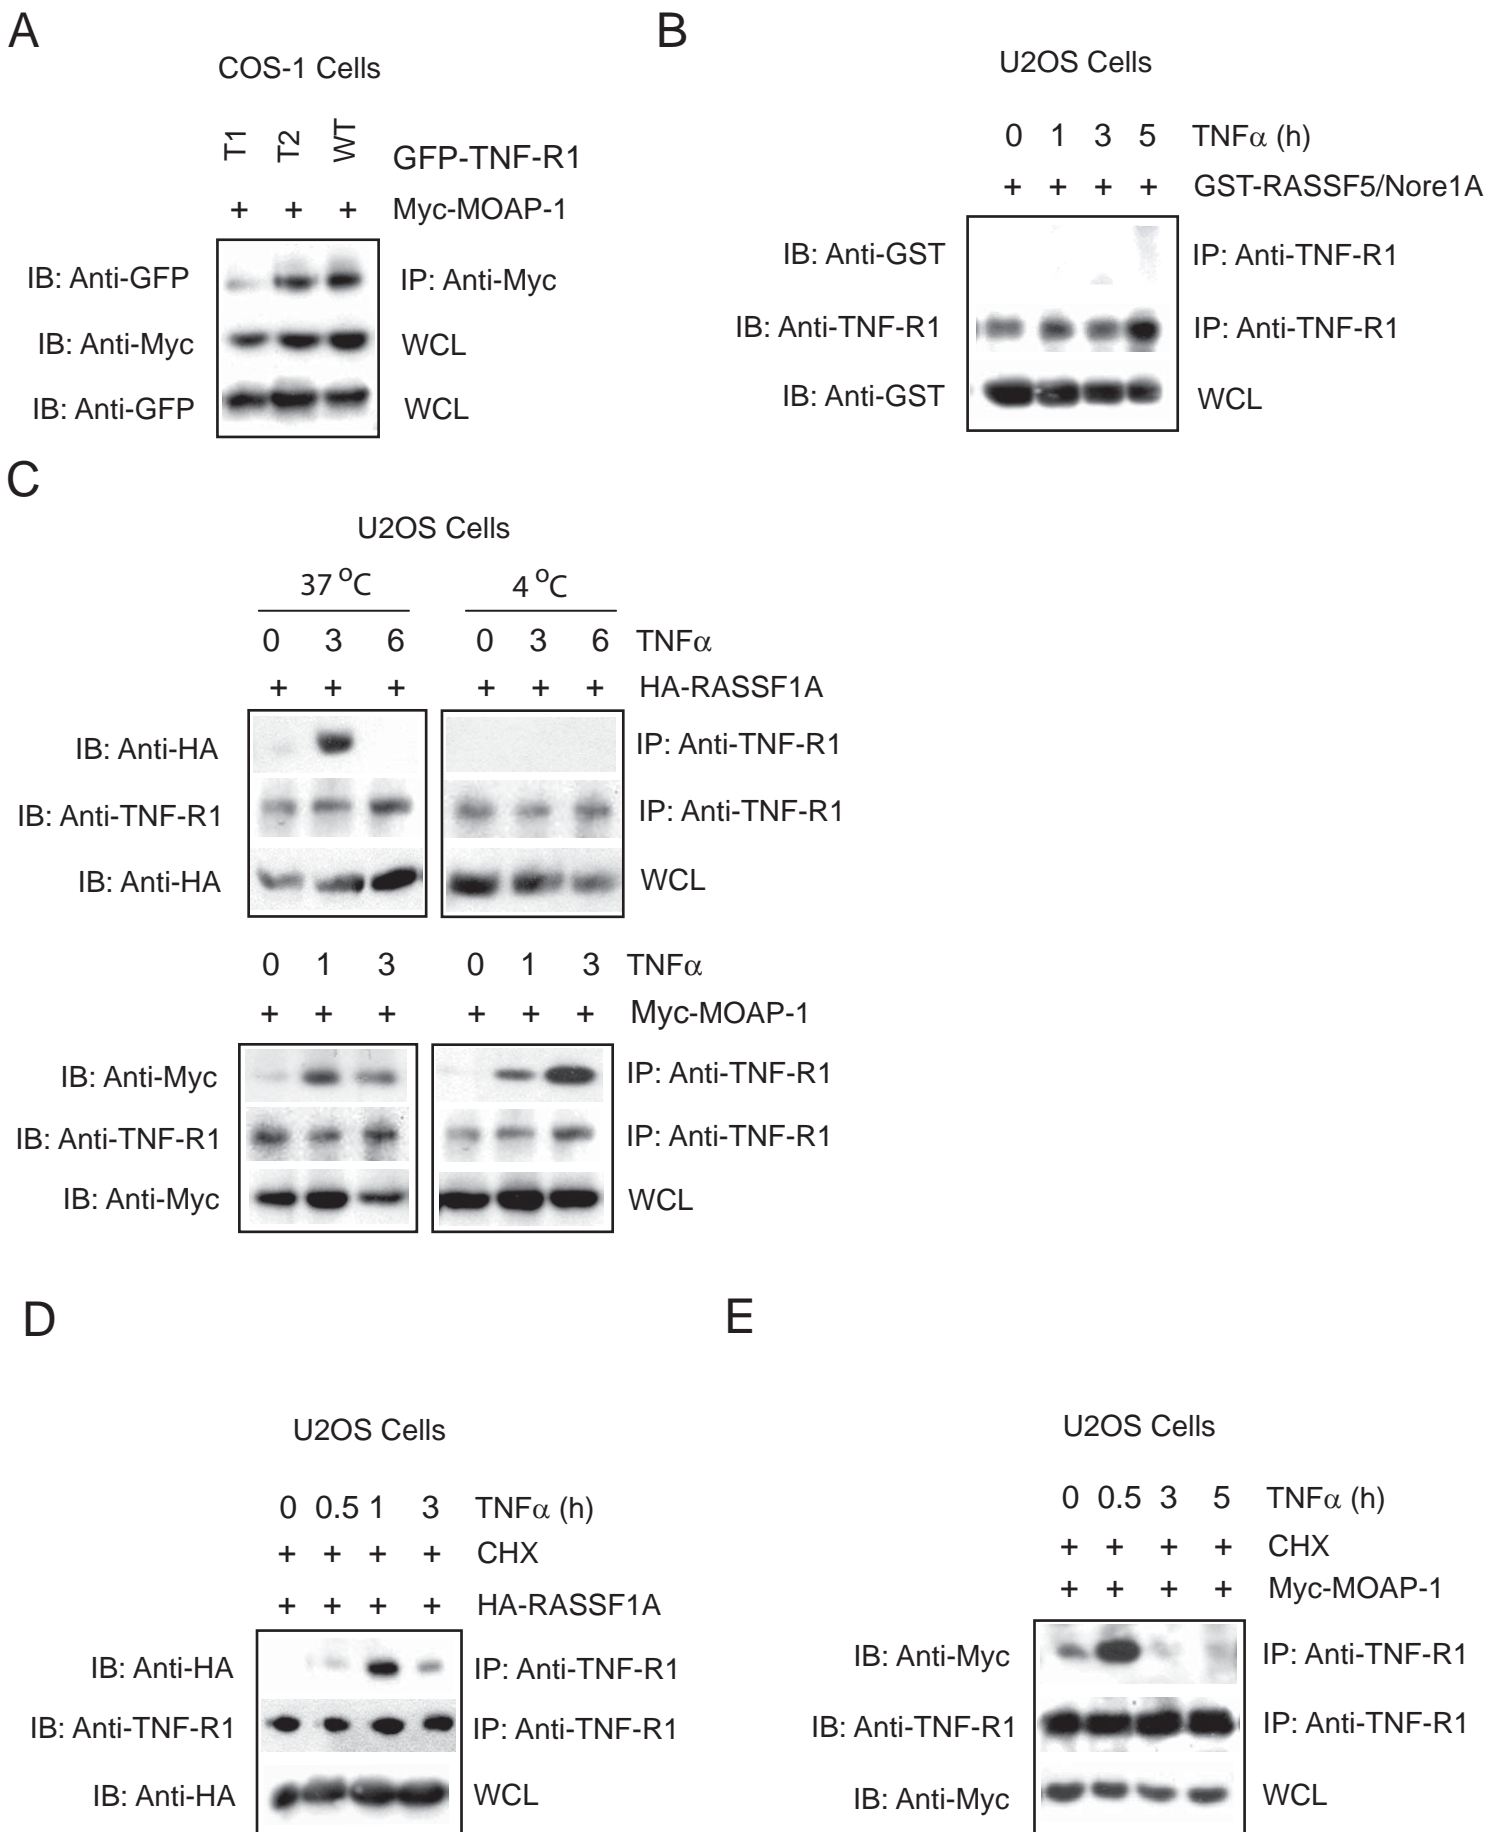

Supplement: supp_28_14_4520__1.pdf [file supp_28_14_4520__1.pdf]
